# Supplementary material for: Direct Readout of Homo- vs Heterochiral Ligand Shell of Quantum Dots
Source: PubMed Central journal article supplement (PMC11261568; doi:10.1021/acsami.4c07648), 2024-07-08
Supplement: am4c07648_si_001.pdf [file am4c07648_si_001.pdf]

## Supporting Information

# Direct Readout of Homo- vs. Heterochiral Ligand Shell of Quantum Dots

*Elżbieta Chwojnowska,<sup>†,§,\*</sup> Aneta A. Kowalska,<sup>†,§,\*</sup> Agnieszka Kamińska<sup>†</sup> and Janusz Lewiński<sup>†,‡,\*</sup>*

<sup>†</sup>Institute of Physical Chemistry Polish Academy of Sciences, Kasprzaka 44/52, 01-224 Warsaw, Poland

<sup>‡</sup>Faculty of Chemistry, Warsaw University of Technology, Noakowskiego 3, 00-664 Warsaw, Poland

§ Authors declare equal contribution

Corresponding authors: echwojnowska@ichf.edu.pl (EC), akowalska@ichf.edu.pl (AK),  
janusz.lewinski@pw.edu.pl (JL)

## Table of Contents

|                                               |            |
|-----------------------------------------------|------------|
| <b>Characterization of ZnO QDs.....</b>       | <b>S2</b>  |
| <b>Transmission Electron Microscopy .....</b> | <b>S2</b>  |
| <b>Circular dichroism .....</b>               | <b>S12</b> |
| <b>Raman Spectroscopy .....</b>               | <b>S14</b> |
| <b>Principal component analysis.....</b>      | <b>S19</b> |

## Characterization of ZnO QDs

### Transmission Electron Microscopy

Size, shape and morphology of the nanoparticles were examined by High-Resolution Transmission Electron Microscopy (HR TEM). Nanoparticle samples were drop-cast (THF or DMSO solution) onto 300-mesh, holey carbon-coated copper grids (Quantifoil). Afterward, the excess solvent evaporated at room temperature. Nanoparticle samples were imaged using a  $C_s$  corrected scanning transmission electron microscope (STEM, HITACHI HD2700, 200 kV). The observations were carry on in three modes: SE (images used to study morphology), HAADF STEM (Z-contrast) and HR TEM (images showing the atomic structure). A wide variety of magnifications (from x1500 up to x8000000) were used to study the microstructure of ZnO samples. The size of nanoparticles was calculated by image analyses, using ImageJ2x computer software. For image analyses a population of 100 particles was used for each sample. Average sizes and standard deviations were calculated from obtained results.

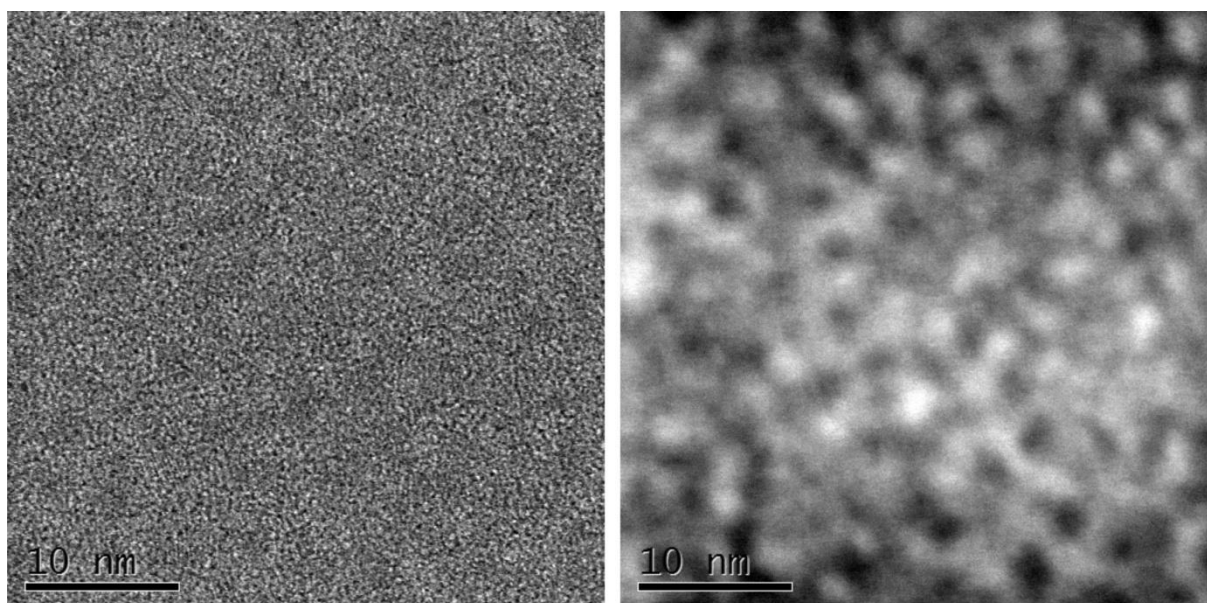

**Figure S1.** Representative HR TEM (left) and HAADF STEM (right) images of  $ZnO^{1RR}$  dispersed in THF.

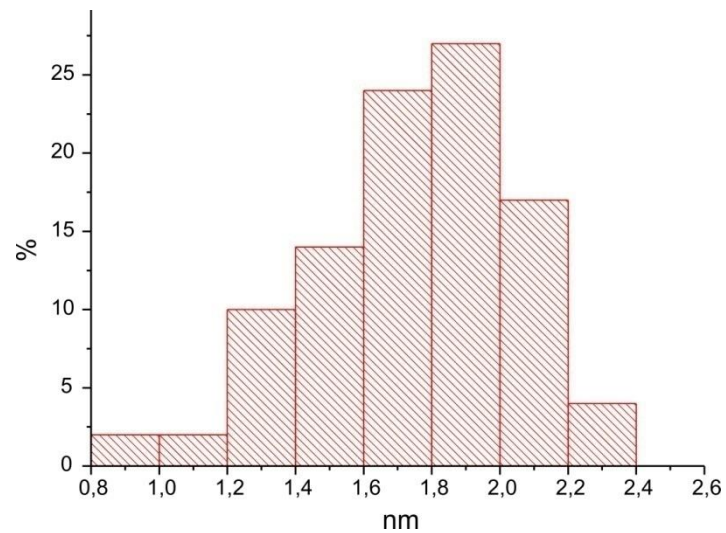

**Figure S2.** Size distribution of  $\text{ZnO}^{1\text{RR}}$  calculated from TEM images. Average size of the inorganic core:  $1.7 \pm 0.3$  nm.

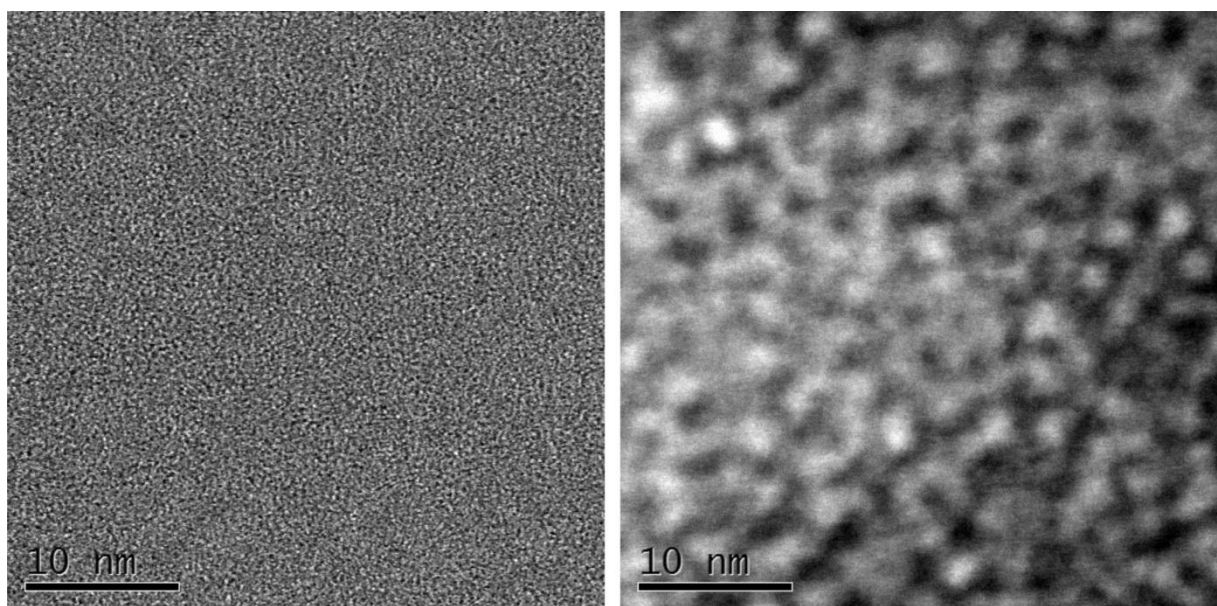

**Figure S3.** Representative HR TEM (left) and HAADF STEM (right) images of  $\text{ZnO}^{1\text{SS}}$  dispersed in THF.

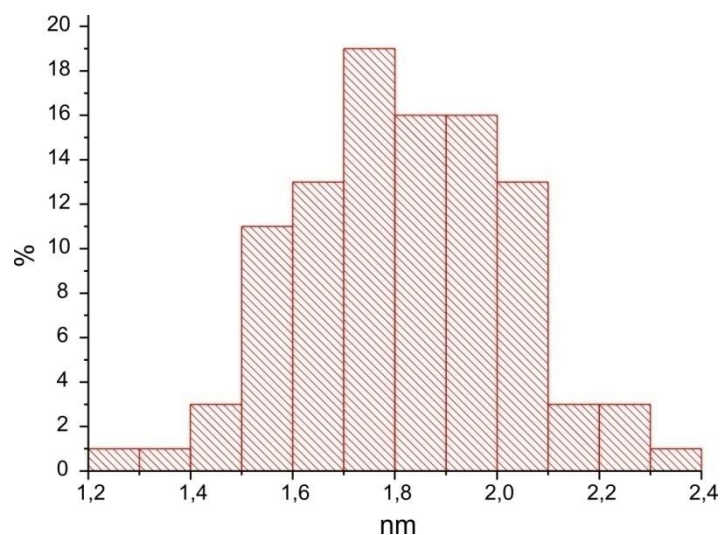

**Figure S4.** Size distribution of  $\text{ZnO}^{1\text{SS}}$  calculated from TEM images. Average size of the inorganic core:  $1.8 \pm 0.2$  nm.

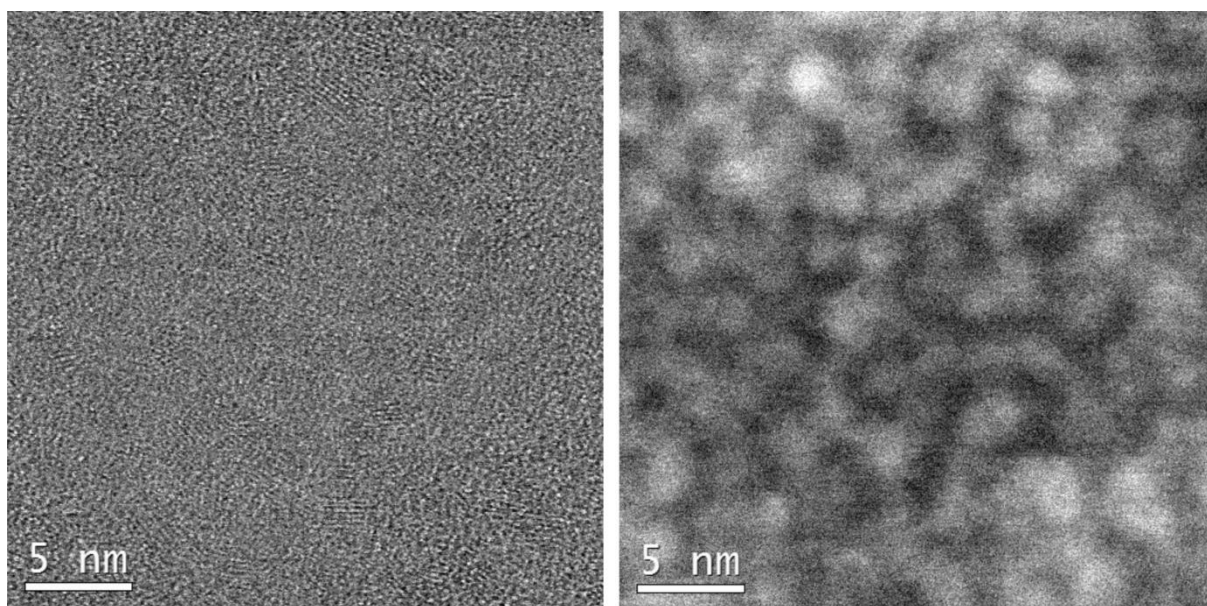

**Figure S5.** Representative HR TEM (left) and HAADF STEM (right) images of  $\text{ZnO}^{1\text{Trac}}$  dispersed in THF.

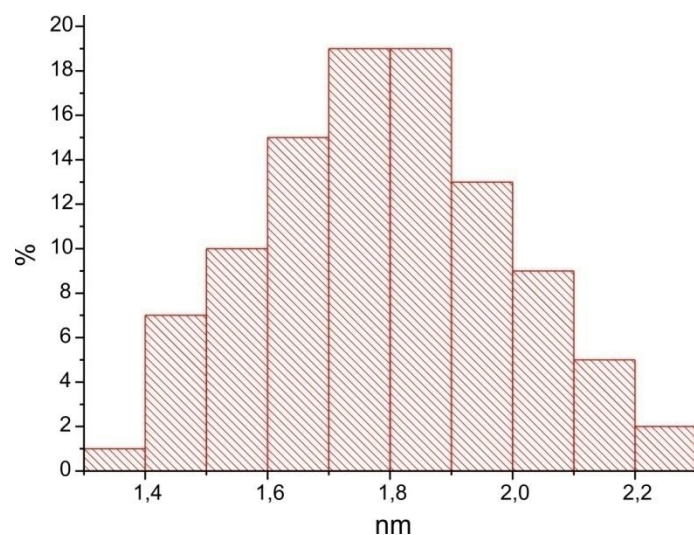

**Figure S6.** Size distribution of  $\text{ZnO}^{\text{ITrac}}$  calculated from TEM images. Average size of the inorganic core:  $1.8 \pm 0.2$  nm.

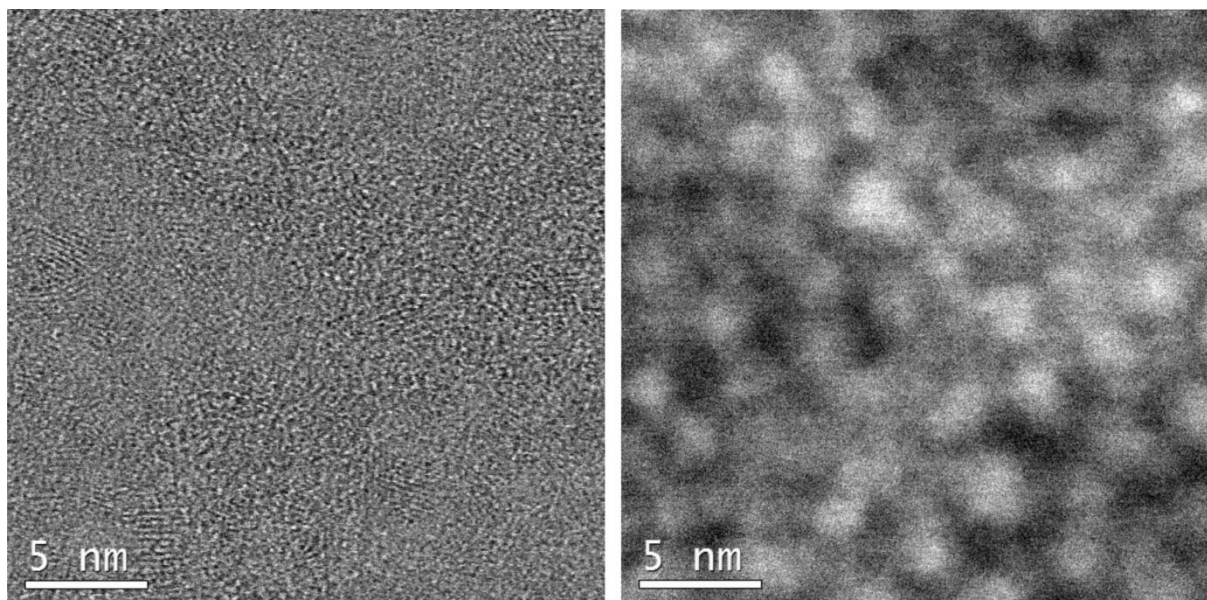

**Figure S7.** Representative HR TEM (left) and HAADF STEM (right) images of  $\text{ZnO}^{\text{ICrac}}$  dispersed in THF.

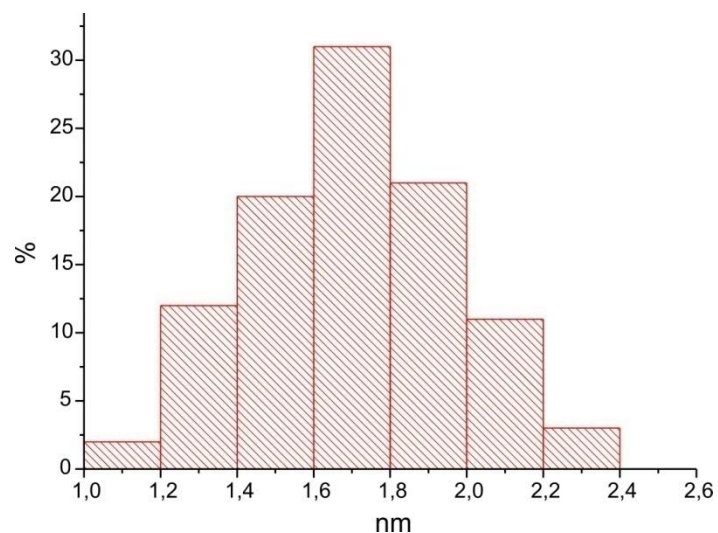

**Figure S8.** Size distribution of  $\text{ZnO}^{\text{ICrac}}$  calculated from TEM images. Average size of the inorganic core:  $1.7 \pm 0.3$  nm.

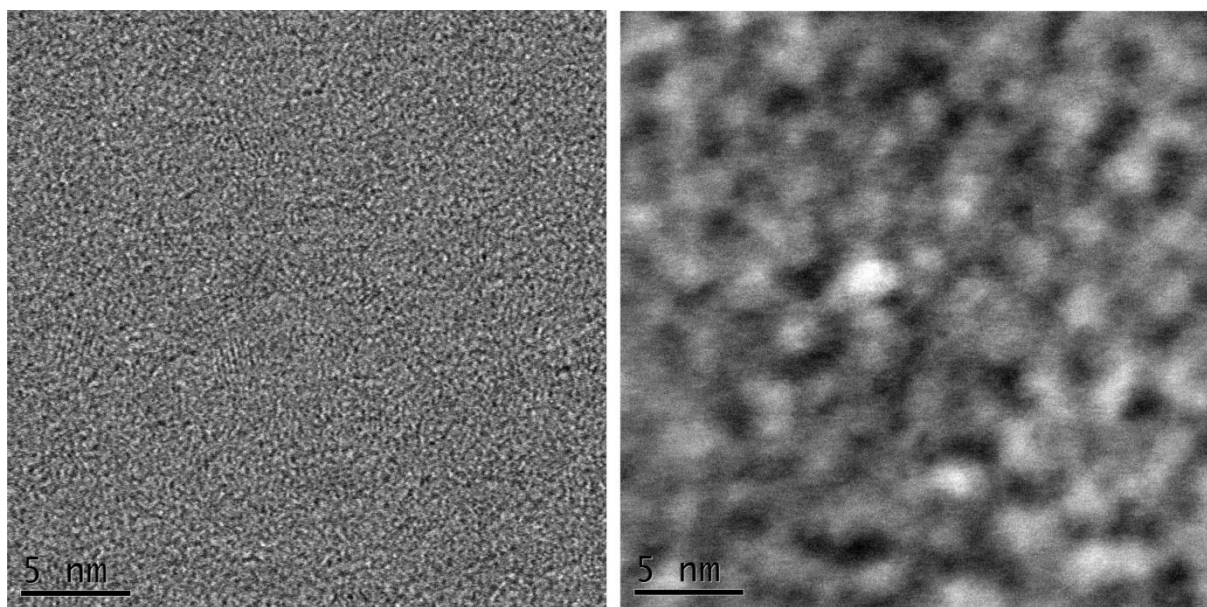

**Figure S9.** Representative HR TEM (left) and HAADF STEM (right) images of  $\text{ZnO}^{\text{1RS}}$  dispersed in THF.

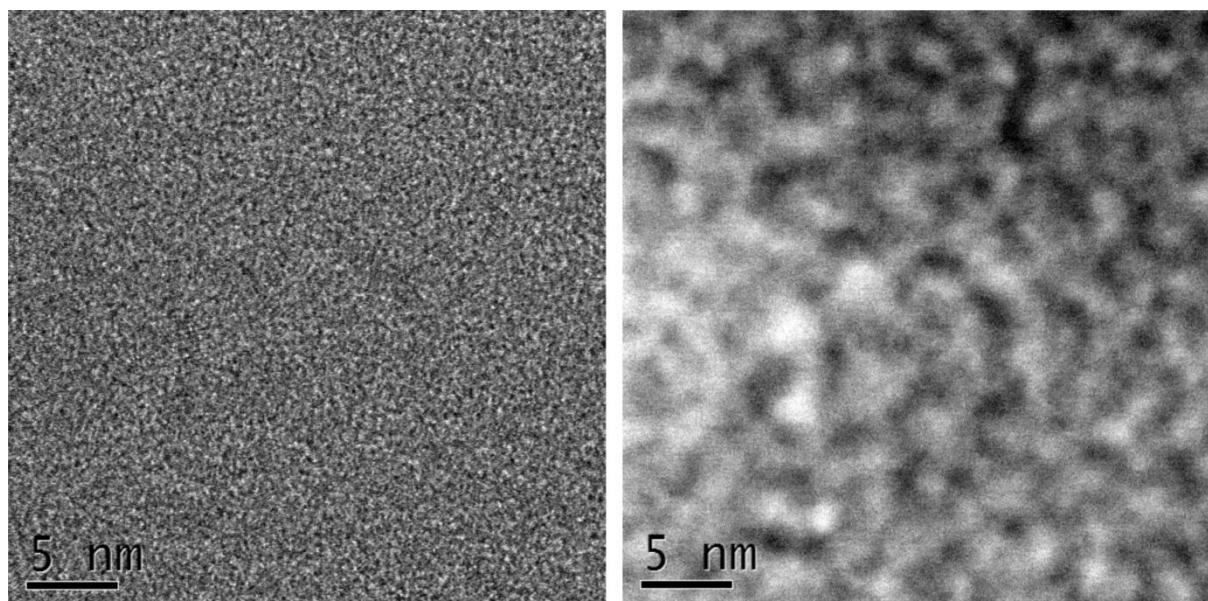

**Figure S10.** Representative HR TEM (left) and HAADF STEM (right) images of  $\text{ZnO}^{1\text{SR}}$  dispersed in THF.

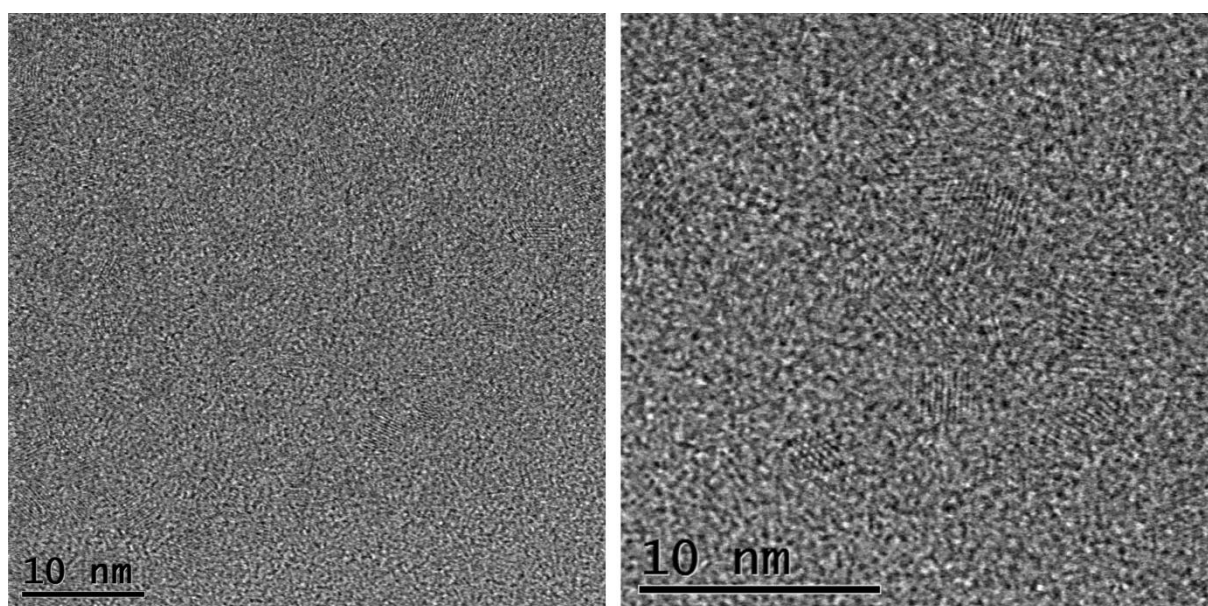

**Figure S11.** Representative HR TEM images of  $\text{ZnO}^{2\text{rac}}$  dispersed in THF.

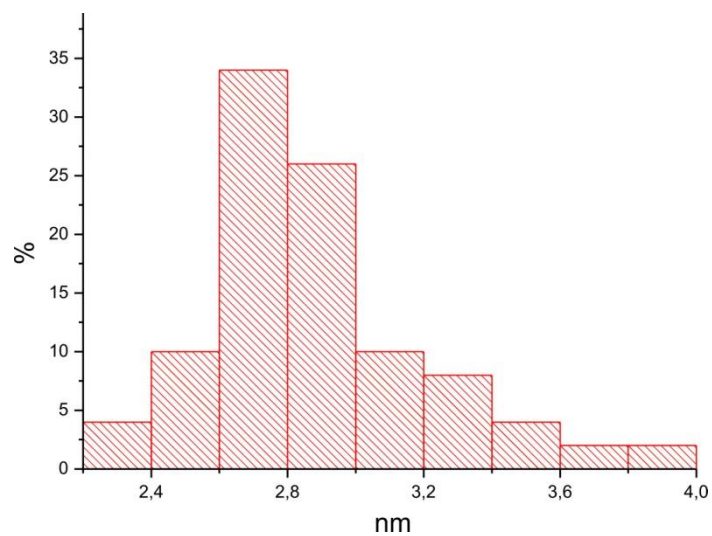

**Figure S12.** Size distribution of  $\text{ZnO}^{2rac}$  calculated from TEM images. Average size of the inorganic core:  $2.9 \pm 0.4$  nm.

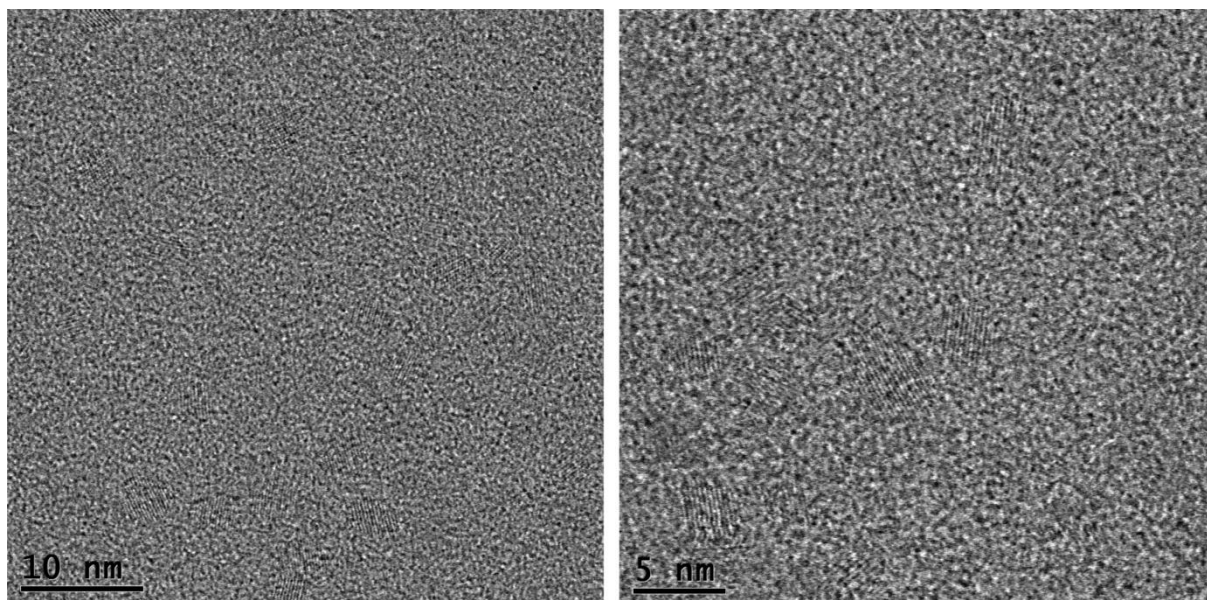

**Figure S13.** Representative HR TEM images of  $\text{ZnO}^{2R}$  dispersed in THF.



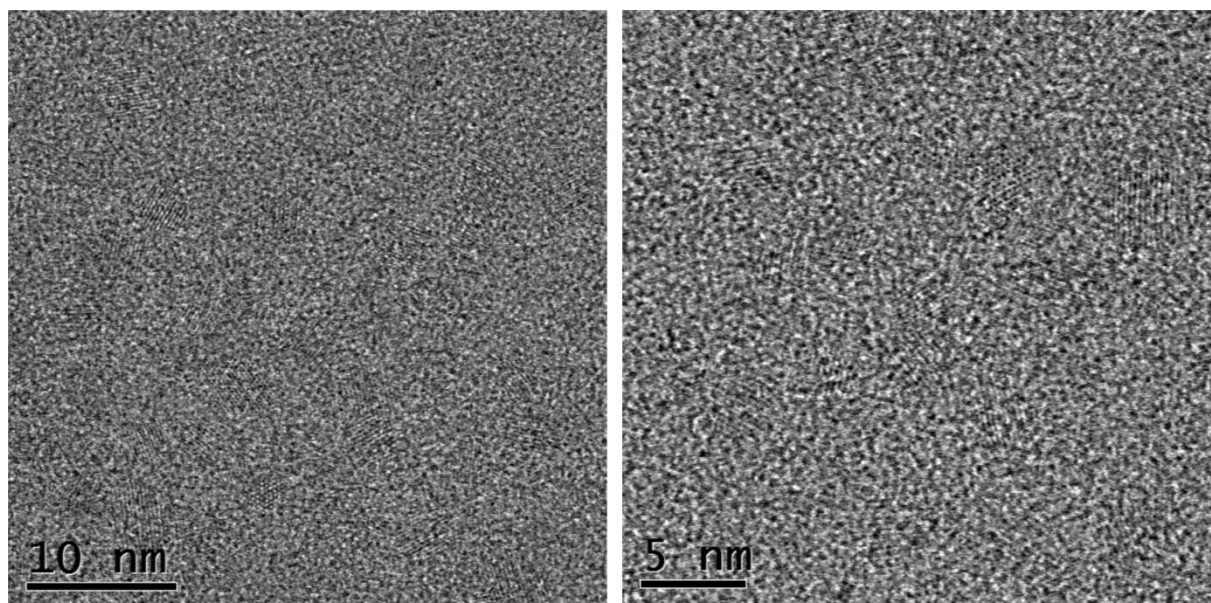

**Figure S14.** Representative HR TEM images of  $\text{ZnO}^{2S}$  dispersed in THF.

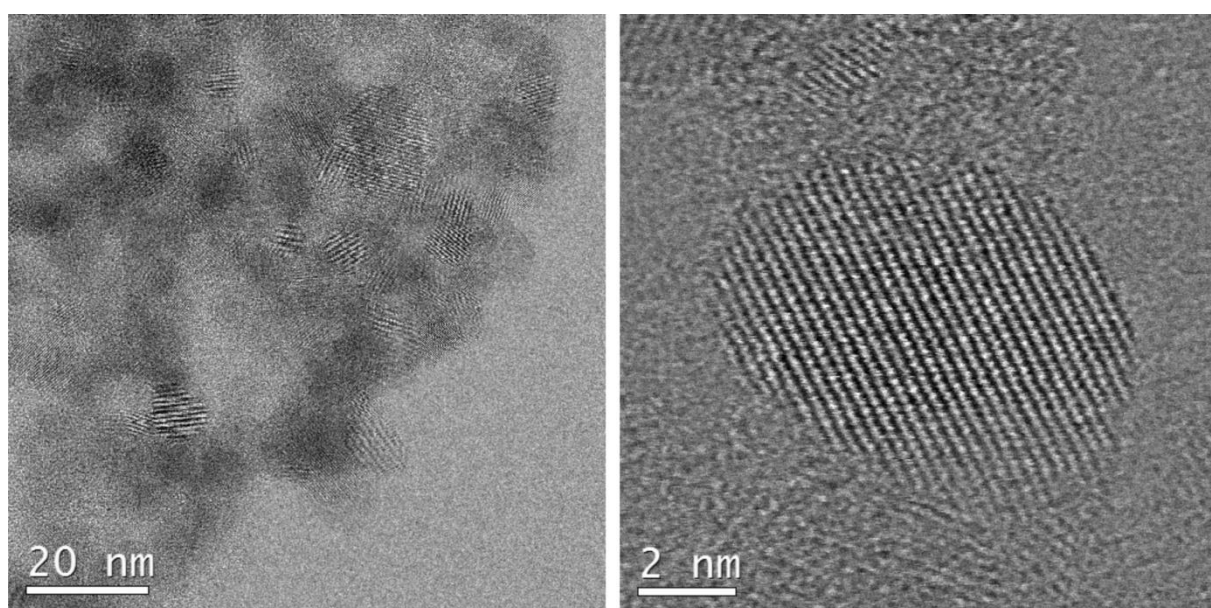

**Figure S15.** Representative HR TEM images of  $\text{ZnO}^{3rac}$  dispersed in THF.

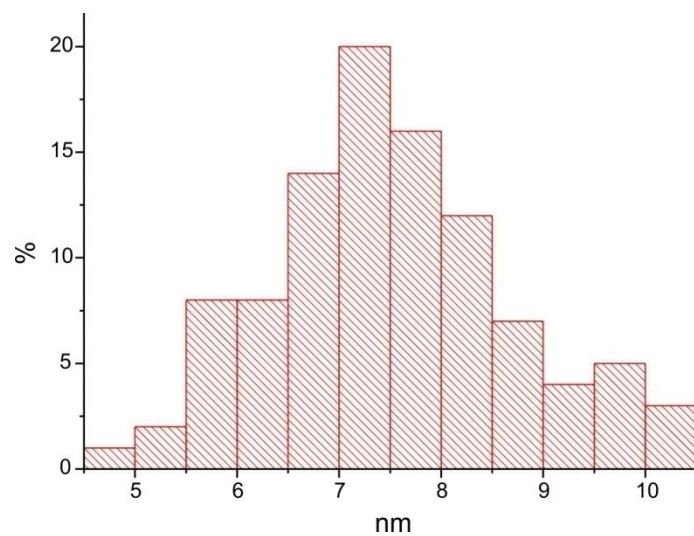

**Figure S16.** Size distribution of  $\text{ZnO}^{3rac}$  calculated from TEM images. Average size of the inorganic core:  $7.5 \pm 1,2$  nm.

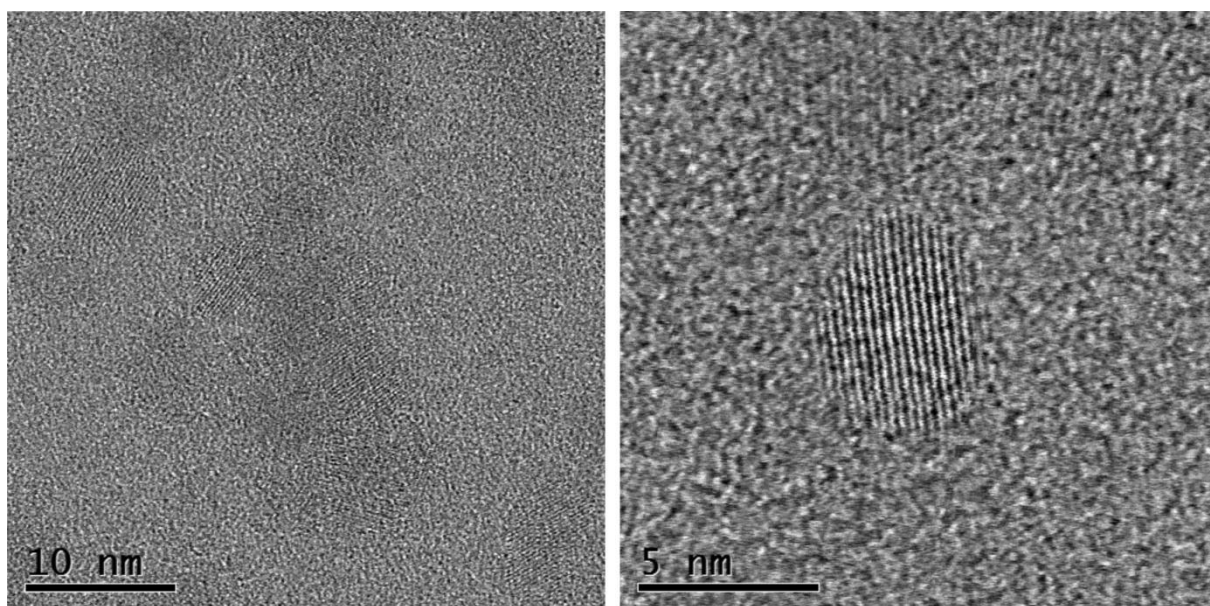

**Figure S17.** Representative HR TEM images of  $\text{ZnO}^{3R}$  dispersed in DMSO.

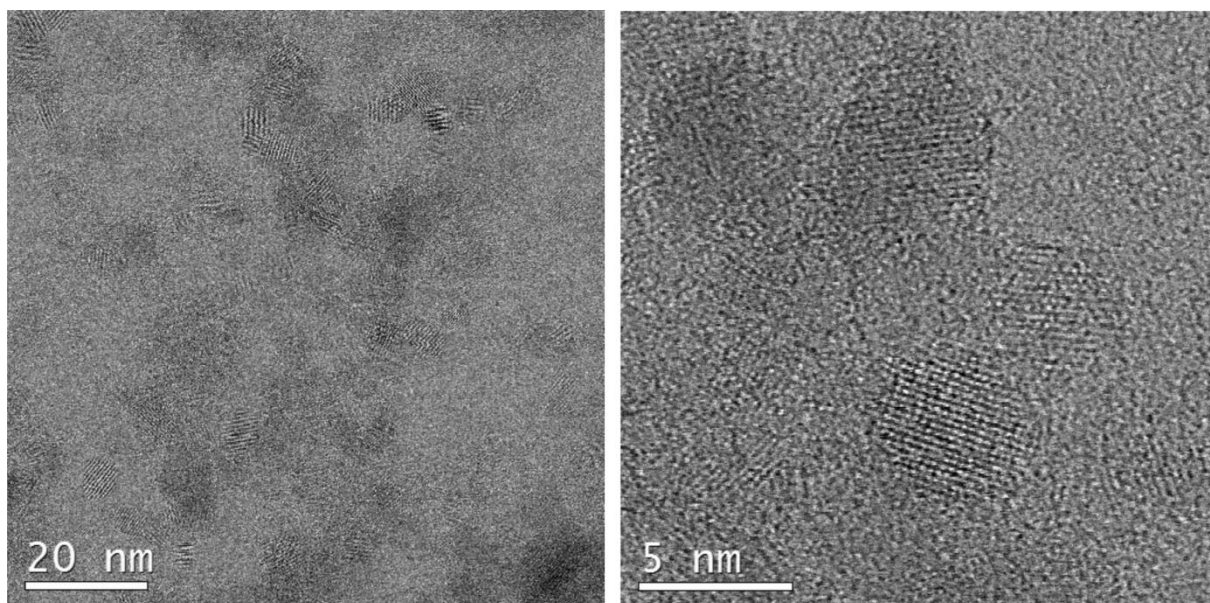

**Figure S18.** Representative HR TEM images of  $\text{ZnO}^{3\text{S}}$  dispersed in DMSO.

Average sizes of the inorganic core of  $\text{ZnO}^{1\text{RS}}$ ,  $\text{ZnO}^{1\text{SR}}$ ,  $\text{ZnO}^{2\text{R}}$ ,  $\text{ZnO}^{2\text{S}}$ ,  $\text{ZnO}^{3\text{R}}$  and  $\text{ZnO}^{3\text{S}}$  are consistent with previously reported.[1] ( $1.7 \pm 0.2$  nm,  $1.7 \pm 0.2$  nm,  $2.9 \pm 0.4$  nm,  $2.9 \pm 0.4$  nm,  $7.5 \pm 1.4$  nm,  $7.5 \pm 1.4$  nm)

## Circular dichroism

Circular dichroism (CD) spectra were recorded with a Jasco J-815 spectropolarimeter in THF or DMSO solution. Absorption analysis was carried out by using a Hitachi U-2910 spectrophotometer, with solvents as reference.

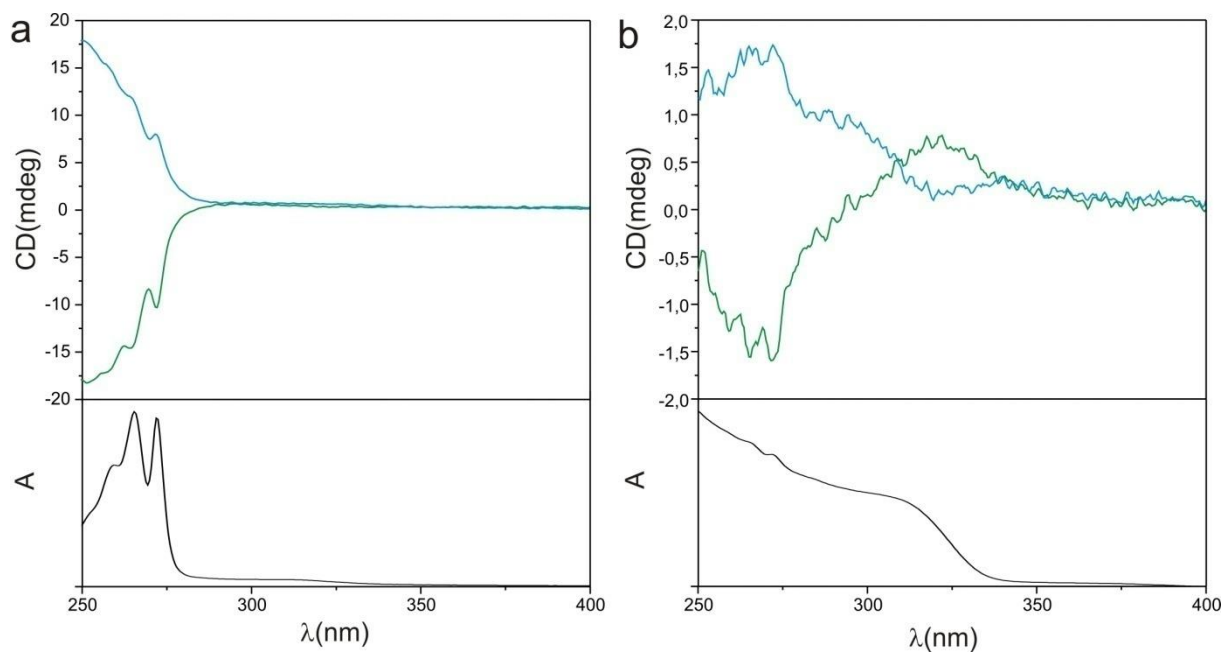

**Figure S19.** CD and normalized absorption spectra of proligands (a): **1RR** (green), **1SS** (blue); ZnO NCs (b): **ZnO<sup>1RR</sup>** (green), **ZnO<sup>1SS</sup>** (blue).

Absorption spectra of **ZnO<sup>1RR</sup>** and **ZnO<sup>1SS</sup>** are essentially identical and on Figure S19 only one representative spectrum is shown.

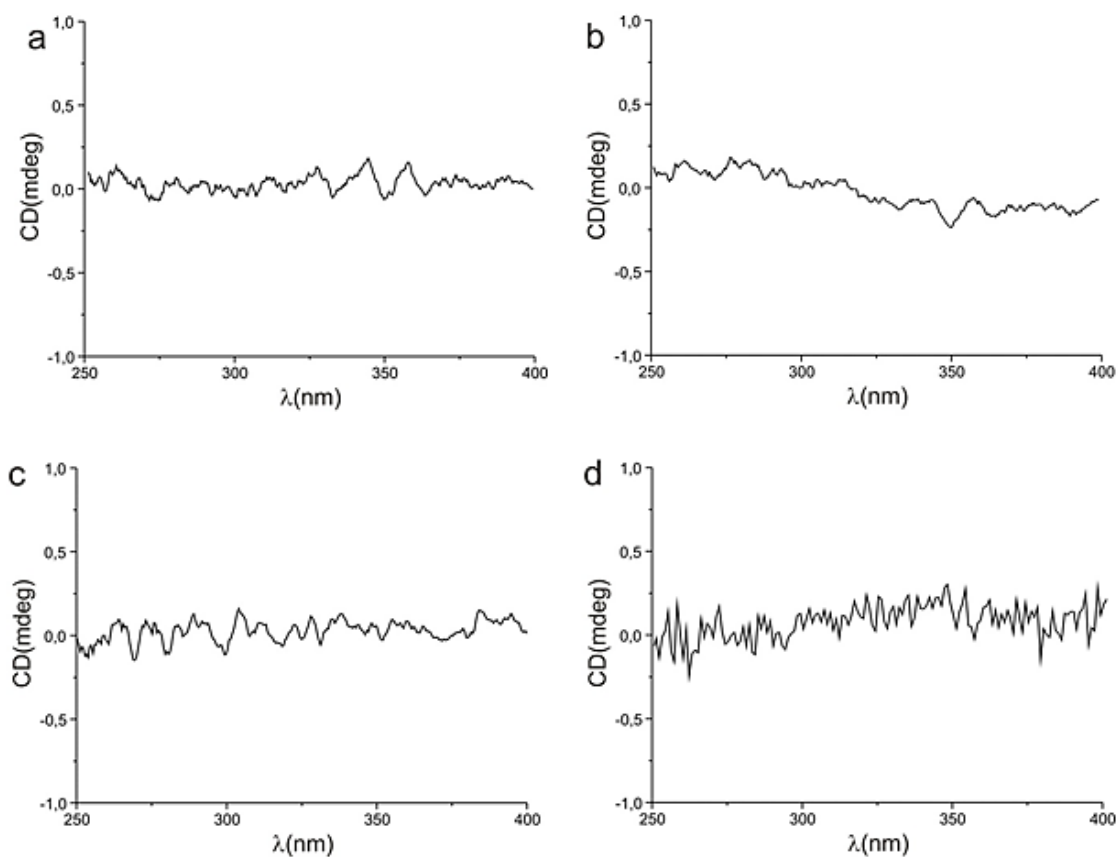

**Figure S20.** CD spectra of ZnO NCs:  $\text{ZnO}^{1\text{Crac}}$  (a);  $\text{ZnO}^{1\text{Trac}}$  (b);  $\text{ZnO}^{2\text{rac}}$  (c);  $\text{ZnO}^{3\text{rac}}$  (d).

CD spectra of  $\text{ZnO}^{1\text{RS}}$ ,  $\text{ZnO}^{1\text{SR}}$ ,  $\text{ZnO}^{2\text{S}}$ ,  $\text{ZnO}^{2\text{R}}$ ,  $\text{ZnO}^{3\text{S}}$  and  $\text{ZnO}^{3\text{R}}$  are consistent with previously reported. [1]

## Raman Spectroscopy

Raman Spectroscopy measurements were carried out in the mapping mode ( $1\text{m}\mu \times 1\text{m}\mu$ ). The spectra were taken in different places of the sample (over 40) using the Renishaw inVia Raman system equipped with the 785 nm diode laser. The light from the laser was passed through a line filter and focused on a sample mounted on an X–Y–Z translation stage with a  $50 \times$  microscope objective,  $\text{NA} = 0.25$ . The beam diameter was approximately  $2.5 \mu\text{m}$ . The laser power at the sample was 5 mW or less.

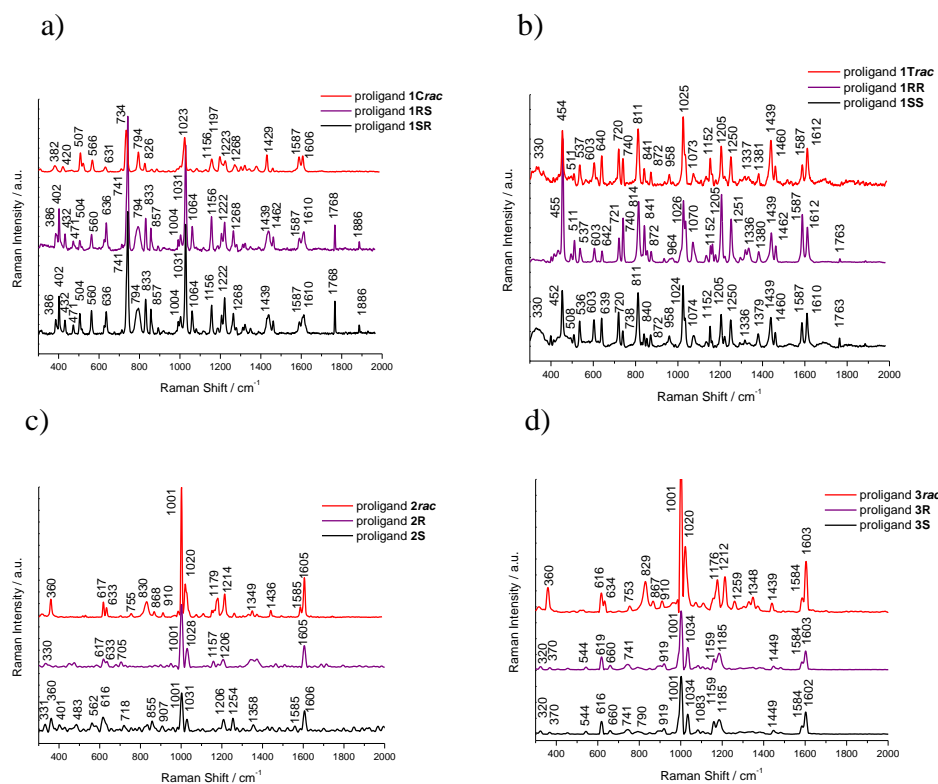

**Figure S21.** The Raman spectra of 1Crac, 1SR, 1RS (a); 1Trac, 1RR, 1SS (b); 2rac, 2S, 2R (c); 3rac, 3S, 3R proligands (d).

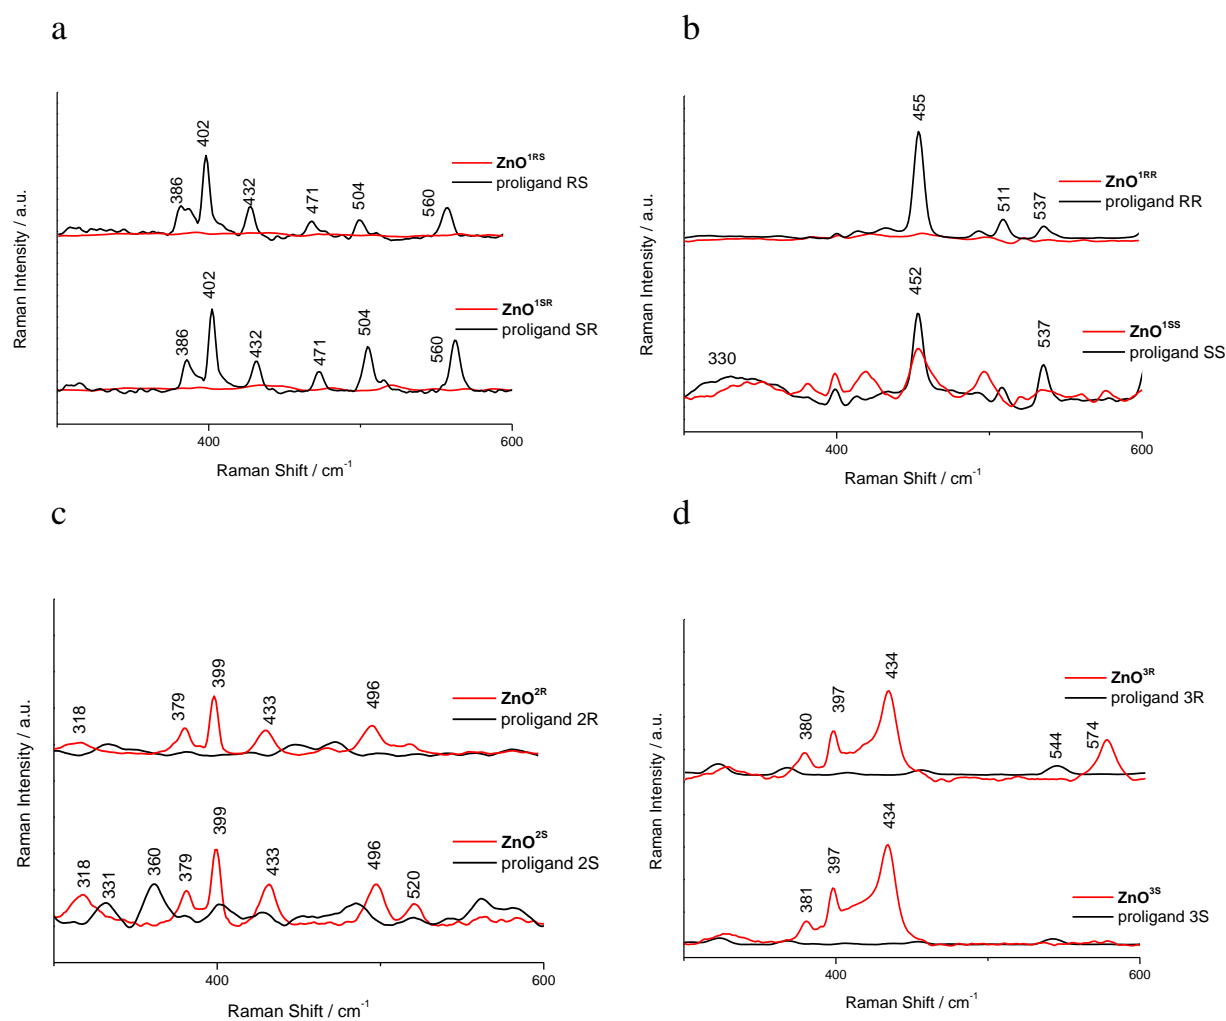

**Figure S22.** The comparison of the Raman spectra recorded for ZnO NCs and proligands in the 300-600  $\text{cm}^{-1}$  region:  $\text{ZnO}^{1\text{RS}}$ ,  $\text{ZnO}^{1\text{SR}}$ , and **1RS**, **1SR** (a);  $\text{ZnO}^{1\text{RR}}$ ,  $\text{ZnO}^{1\text{SS}}$ , and **1RR**, **1SS** (b);  $\text{ZnO}^{2\text{R}}$ ,  $\text{ZnO}^{2\text{S}}$ , and **2S**, **2R** (c);  $\text{ZnO}^{3\text{R}}$ ,  $\text{ZnO}^{3\text{S}}$ , and **3S**, **3R** (d).

**Table S1.** Tentative assignments of the Raman bands observed for proligands. [2,3,4]

| Raman band positions [ $\text{cm}^{-1}$ ] |                  |                |                | Assignments*                 |
|-------------------------------------------|------------------|----------------|----------------|------------------------------|
| <b>1SS / 1RR</b>                          | <b>1SR / 1RS</b> | <b>2S / 2R</b> | <b>3S / 3R</b> |                              |
| 330/-                                     |                  | 331/330        | 320            | $\gamma$ CCC + $\gamma$ CH,  |
|                                           | 386              | 360/-          | 370            | $\delta$ CC + $\delta$ OH,   |
|                                           | 402              | 401/-          |                | $\delta$ CN + $\delta$ CCNH, |
|                                           | 432              |                |                | $\delta$ CN + $\delta$ CCNH, |
| 452 /455                                  | 471              | 483            |                | vbenz. angle bend            |
| 508/511                                   | 504              |                |                |                              |

|           |      |           |           |                                                          |
|-----------|------|-----------|-----------|----------------------------------------------------------|
| 536/537   | 560  | 562       | 544       |                                                          |
| 603       |      | 616/617   |           | CCC angle bend<br>(5-mem.),<br>$\omega$ CH, $\omega$ NH  |
| 639/642   | 636  | -/633     | 616/619   |                                                          |
|           |      |           | 660       |                                                          |
| 720/721   |      | 718/705   |           | v CC (5-mem.),                                           |
| 738/740   | 741  |           | 741       |                                                          |
| -         | 794  |           | 790/-     | v CC (5-mem.),<br>$\gamma$ CH + $\gamma$ COH             |
| 811/814   |      |           |           | NH <sub>2</sub> , $\gamma$ NH + $\gamma$<br>CCN, CH wag, |
| 840/841   | 833  |           |           |                                                          |
| 872       | 857  | 855/-     |           |                                                          |
|           |      | 907/-     | 919       | CH <sub>2</sub> rock                                     |
| 958/964   |      |           |           | v CC (5-mem.),<br>$\gamma$ NH + $\gamma$ CCN             |
|           | 1004 | 1001      | 1001      | $\gamma$ CH + $\gamma$ CCC,                              |
| 1024/1026 | 1031 | 1031/1028 | 1034      | $\rho$ (OH) + (CH) +<br>(NH <sub>2</sub> ),              |
| 1074/1070 | 1064 |           | 1083/-    | v CO $\delta$ CC,                                        |
| 1152      | 1156 | -/1157    | 1159      | v C=C + $\delta$ CH,                                     |
| 1178      | 1186 | 1186      | 1185      |                                                          |
| 1205      | 1206 | 1206      | -         | $\delta$ CH + $\delta$ COH                               |
| -         | 1222 | -         | -         | $\delta$ CH + $\delta$ CCH                               |
| 1250/1251 | 1268 | 1254/-    |           |                                                          |
| 1336      |      | 1358/1346 |           |                                                          |
| 1379/1380 |      |           |           | $\delta$ NH + $\delta$ CH                                |
| 1439      | 1439 |           | 1449      | v C=C + $\delta$ CH                                      |
| 1460/1462 | 1462 |           |           |                                                          |
| 1587      | 1587 | 1585      | 1584      | v C=C + $\delta$ CH                                      |
| 1610/1612 | 1610 | 1606/1605 | 1602/1603 | v C=C + v CO                                             |

**\*v: stretching,  $\delta$ : in-plane bending,  $\gamma$ : out-of-plane bending,  $\omega$ : wagging,  $\rho$ : rocking, comb. mod.: combination modes.**



**Table S2.** Tentative assignments of the Raman bands observed in the spectra of chiral ZnO NCs. [2, 3, 4]

| Raman band positions [cm <sup>-1</sup> ]   |                                            |                                          |                                          | Assignments*                                             |
|--------------------------------------------|--------------------------------------------|------------------------------------------|------------------------------------------|----------------------------------------------------------|
| ZnO <sup>1SS</sup><br>/ ZnO <sup>1RR</sup> | ZnO <sup>1SR</sup><br>/ ZnO <sup>1RS</sup> | ZnO <sup>2S</sup><br>/ ZnO <sup>2R</sup> | ZnO <sup>3S</sup><br>/ ZnO <sup>3R</sup> |                                                          |
| -                                          | -                                          | 328/328                                  | 328/328                                  | γ CCC + γ CH,<br>ZnO (E <sub>2H</sub> -E <sub>2L</sub> ) |
| -                                          | -                                          | 379/379                                  | 380/381                                  | δ CC + δ OH,<br>ZnO (A <sub>1</sub> (TO))                |
| -                                          | -                                          | 399/399                                  | 397/397                                  | δ CN + δ CCNH,<br>ZnO (E <sub>2</sub> )                  |
| 420                                        | -                                          | 433/433                                  | 434/434                                  | δ CN + δ CCNH,<br>ZnO (E <sub>2H</sub> )                 |
| 452/459                                    | -                                          | -                                        | -                                        | vbenz. angle bend,<br>ZnO comb. mod.                     |
| 497/-                                      | -                                          | -                                        | -                                        |                                                          |
| 649, 679,<br>720/728                       | 689/692                                    | -                                        | -                                        | CCC angle bend<br>(5-mem.),<br>ω CH, ω NH                |
| -                                          | 753/742                                    | -                                        | -                                        | v CC (5-mem.),                                           |
| -/786                                      | -                                          | 769                                      | -                                        | v CC (5-mem.),<br>γ CH + γ COH                           |
| 812/816                                    | 829                                        | -                                        | 829/830                                  | CC, NH <sub>2</sub> , γ NH +<br>γ CCN                    |
| 851/854                                    | 860/860                                    | 851/852                                  | -                                        | CH wag, γ NH + γ<br>CCN,<br>ZnO comb. mod.               |
| 878                                        | 887                                        | -                                        | -                                        | CH <sub>2</sub> rock                                     |
| 928/928                                    | 947/-                                      | -                                        | 932/932                                  | v CC (5-mem.),<br>γ NH + γ CCN                           |
| 1007/-                                     | -                                          | 1000/ 998,                               | 997/997                                  | γ =CH + γ CCC,<br>ZnO (A <sub>1</sub> )                  |
| 1022/1025                                  | 1018/-                                     | 1026/1017                                | 1024/1017                                |                                                          |

|           |           |                |                |                                                                      |
|-----------|-----------|----------------|----------------|----------------------------------------------------------------------|
|           | 1033/1032 | 1023/1024      |                | $\gamma$ CH, $\rho$ (OH) + (CH) + (NH <sub>2</sub> ), ZnO comb. mod. |
| 1041/1045 | 1050/1050 | 1053/1054      |                | $\gamma$ CH, $\nu$ CC, ZnO (A <sub>1</sub> )                         |
| 1083/1089 | 1096/1096 | 1077/1091,1118 | 1079/1089,1116 | $\gamma$ CH, $\nu$ CO, $\delta$ CC, ZnO comb. mod.                   |
| 1159/1163 | 1169/1171 | -              | 1157/-         | $\nu$ C=C + $\delta$ CH, ZnO comb. mod.                              |
| -         | -         | -              | 1181/-         | $\delta$ CH + $\delta$ COH                                           |
| 1212/1215 | 1222/1222 | -              | -              | $\delta$ CH + $\delta$ CCH                                           |
| -         | -         | 1294/1256      | 1294/1294      |                                                                      |
| 1316/1297 | 1326/1304 | -/1316         | -              |                                                                      |
| -         | -         | 1345/1345      | 1347/-         |                                                                      |
| 1387/1391 | 1396/1391 | -              | -              | $\delta$ NH + $\delta$ CH                                            |
| -         | -         | 1421/1413      | 1420/1410      | $\sigma$ HCH                                                         |
| 1442/1446 | 1439/1435 | -              | -              | $\nu$ C=C + $\delta$ =CH                                             |
| -         | 1490/1490 | 1471/1464      | 1473/1465      |                                                                      |
| -         | -         | 1555/1565      | 1554/1566      |                                                                      |
| 1588/-    | 1597/-    | -              | -              | $\nu$ C=C + $\delta$ CH                                              |
| 1602/1604 | -         | 1601/1600      | 1601/1601      | $\sigma$ NH <sub>2</sub>                                             |
| -         | 1615/1612 | -              | -              | $\nu$ C=C + $\nu$ C-O                                                |

**\* $\nu$ : stretching,  $\delta$ : in-plane bending,  $\gamma$ : out-of-plane bending,  $\omega$ : wagging,  $\rho$ : rocking,  $\sigma$ : scissoring, comb. mod.: combination modes. All OH vibration modes are assignment based on the literature, however in our case it is oxygen atom from ligand bonded to ZnO surface.**

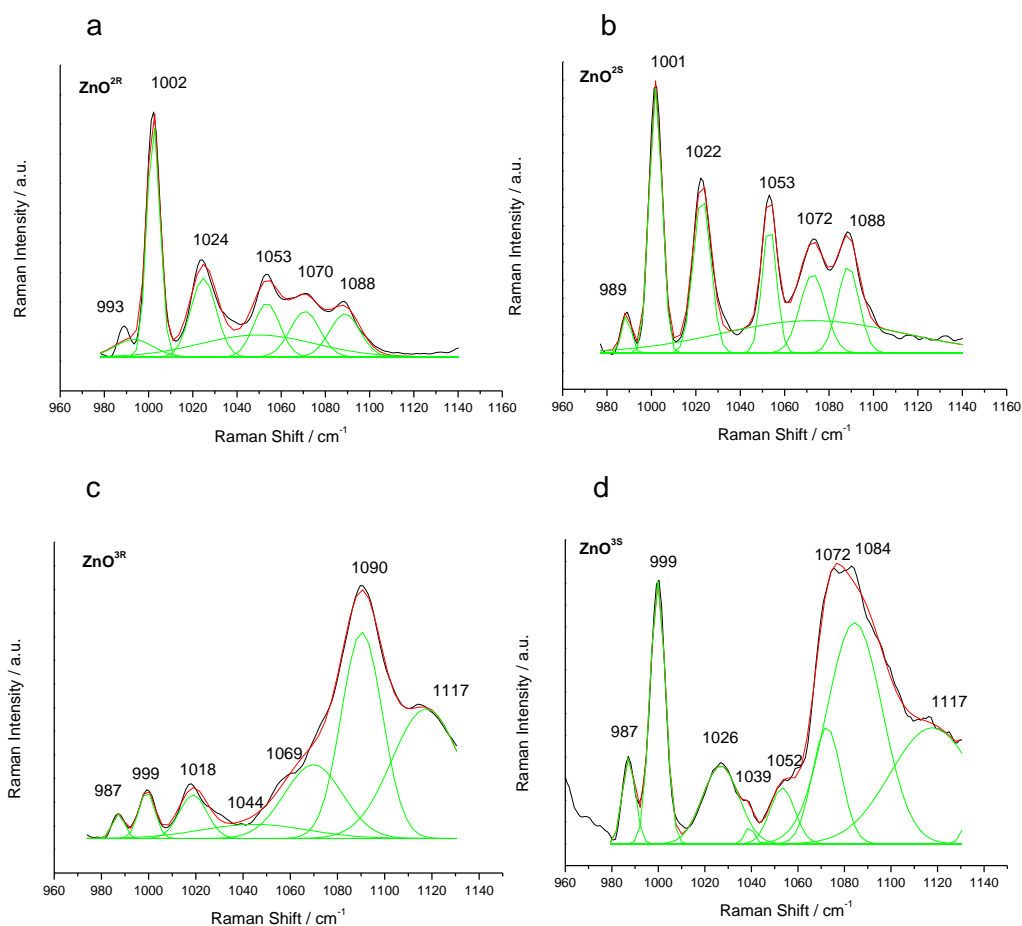

**Figure S23.** The Raman spectra in the 960-1160  $\text{cm}^{-1}$  region collected for  $\text{ZnO}^{2\text{R}}$  (a),  $\text{ZnO}^{2\text{S}}$  (b),  $\text{ZnO}^{3\text{R}}$ (c),  $\text{ZnO}^{3\text{S}}$  (d). For the assignment see Table S1.

### The component principal analysis

The component principal analysis(PCA) was performed over the pre-processed Raman spectra. First, Raman spectra were smoothed with Savitsky-Golay filter, the background was removed using baseline correction (10 itenary and 64 points), and then the spectra were normalized using a so-called Min-Max normalization using a built-in OPUS software package (Bruker Optic GmbH 2012 version). After that, the data were transferred to the Unscrambler software (CAMO software AS, version 10.3, Norway), where the PCA calculation was performed based onto the NIPALS algorithm, validation (random with 20 segments), significance 0.05 and the 90 number of samples (Raman spectra).The presented below data are based on the PCA analysis for the regions of 200-2000  $\text{cm}^{-1}$  wavenumbers.

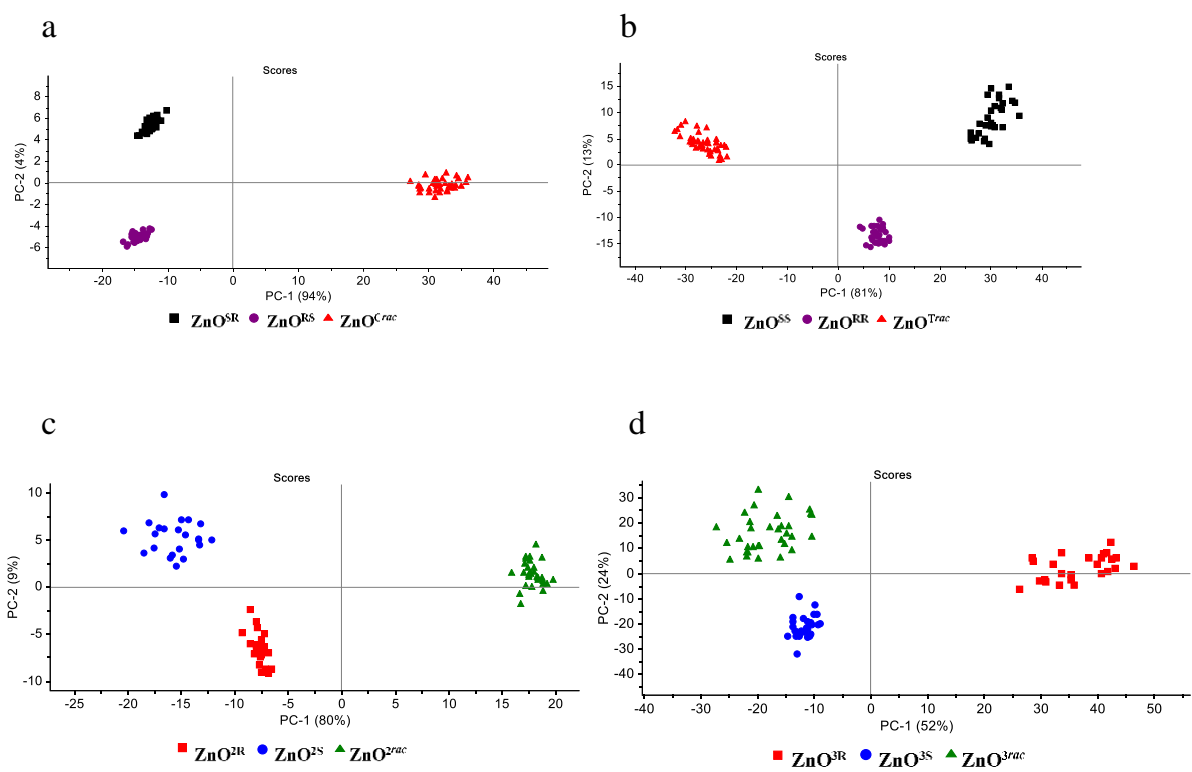

**Figure S24.** PCA scores of  $\text{ZnO}^{1\text{SR}}$ ,  $\text{ZnO}^{1\text{RS}}$ ,  $\text{ZnO}^{1\text{Crac}}$  (a);  $\text{ZnO}^{1\text{RR}}$ ,  $\text{ZnO}^{1\text{SS}}$ ,  $\text{ZnO}^{1\text{Trac}}$  (b);  $\text{ZnO}^{2\text{R}}$ ,  $\text{ZnO}^{2\text{S}}$ ,  $\text{ZnO}^{2\text{rac}}$  (c);  $\text{ZnO}^{3\text{R}}$ ,  $\text{ZnO}^{3\text{S}}$ ,  $\text{ZnO}^{3\text{rac}}$  (d). All calculation made in the 200 - 2000  $\text{cm}^{-1}$  region.

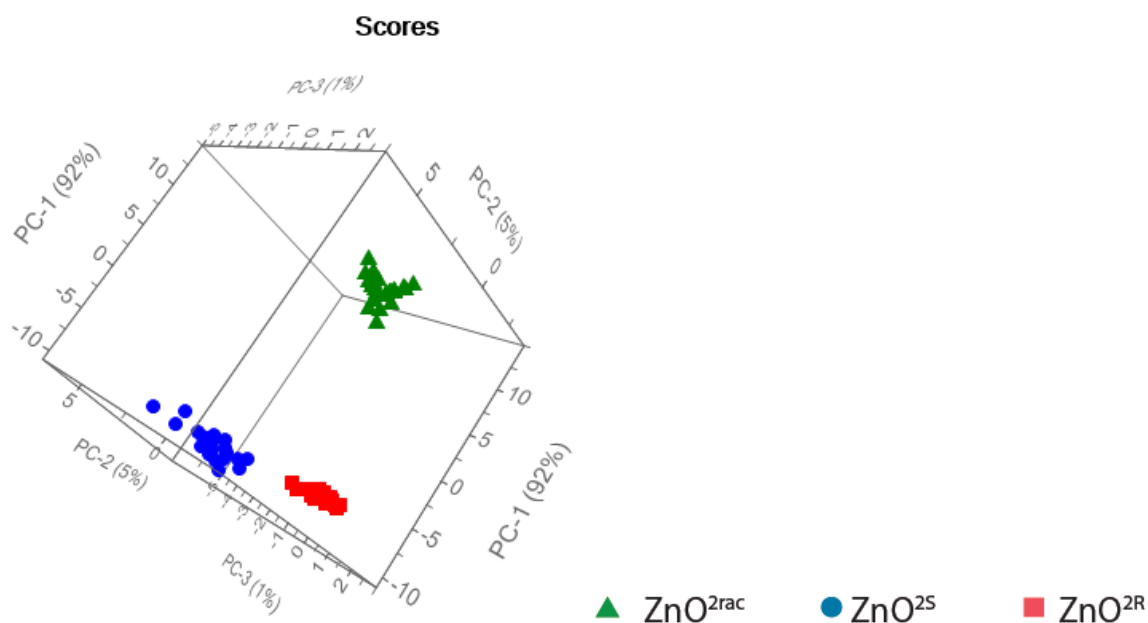

**Figure S25.** PCA scores of  $\text{ZnO}^{2\text{R}}$ ,  $\text{ZnO}^{2\text{S}}$ , and  $\text{ZnO}^{2\text{rac}}$ . For 960 – 1120  $\text{cm}^{-1}$  range.

**Table S3.** Calculated the weighted variables (absolute values) in the loading of PC1 and PC1 + PC2 scores for the 960-1120 cm<sup>-1</sup> region. The most weighted variables are bolded.

| Analyzed groups of ZnO NCs                                                        | Variable    | weighting   | PC1 + PC2 [%] |
|-----------------------------------------------------------------------------------|-------------|-------------|---------------|
| <i>ZnO<sup>IRS</sup>, ZnO<sup>ISR</sup>, ZnO<sup>ICrac</sup></i>                  | 1018        | 0.08        | <b>99</b>     |
|                                                                                   | 1024        | 0.16        |               |
|                                                                                   | 1033        | 0.03        |               |
|                                                                                   | <b>1043</b> | <b>0.30</b> |               |
|                                                                                   | 1057        | 0.02        |               |
| <i>ZnO<sup>IRR</sup>, ZnO<sup>ISS</sup>, ZnO<sup>ITrac</sup></i>                  | 1007        | 0.01        | <b>97</b>     |
|                                                                                   | 1012        | 0.10        |               |
|                                                                                   | <b>1022</b> | <b>0.32</b> |               |
|                                                                                   | 1032        | 0.08        |               |
|                                                                                   | 1038        | 0.06        |               |
|                                                                                   | 1050        | 0.02        |               |
|                                                                                   | 1083        | 0.06        |               |
| <i>Zn<sup>2R</sup>, ZnO<sup>2S</sup>, ZnO<sup>2rac</sup></i>                      | 1006        | 0.07        | <b>97</b>     |
|                                                                                   | 1012        | 0.05        |               |
|                                                                                   | <b>1022</b> | <b>0.43</b> |               |
|                                                                                   | 1040        | 0.02        |               |
|                                                                                   | 1048        | 0.07        |               |
|                                                                                   | 1074        | 0.05        |               |
| <i>ZnO<sup>3R</sup>, ZnO<sup>3S</sup>, ZnO<sup>3rac</sup></i>                     | <b>1000</b> | <b>0.29</b> | <b>87</b>     |
|                                                                                   | 1014        | 0.003       |               |
|                                                                                   | 1032        | 0.10        |               |
|                                                                                   | 1054        | 0.003       |               |
|                                                                                   | 1089        | 0.13        |               |
| <i>ZnO<sup>IRR</sup>, ZnO<sup>ISS</sup>, ZnO<sup>IRS</sup>, ZnO<sup>ISR</sup></i> | 1006        | 0.08        | <b>96</b>     |
|                                                                                   | 1012        | 0.09        |               |
|                                                                                   | <b>1022</b> | <b>0.32</b> |               |
|                                                                                   | 1033        | 0.05        |               |
|                                                                                   | 1042        | 0.12        |               |
|                                                                                   | 1082        | 0.04        |               |

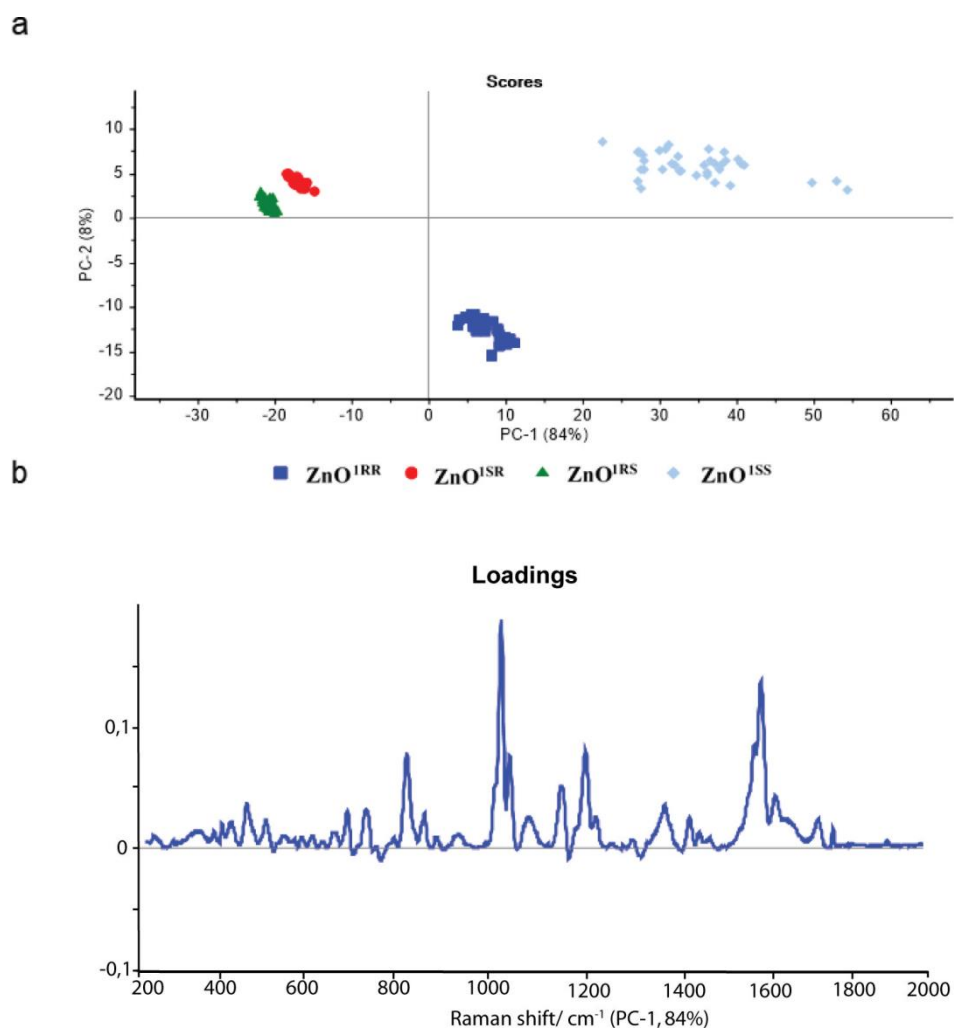

**Figure S26.** Scheme presents the PCA classification of ZnO<sup>ISS</sup>, ZnO<sup>IRR</sup>, ZnO<sup>ISR</sup> and ZnO<sup>IRS</sup>, (a) and the loadings (b) performed for 200 - 2000 cm<sup>-1</sup> region.

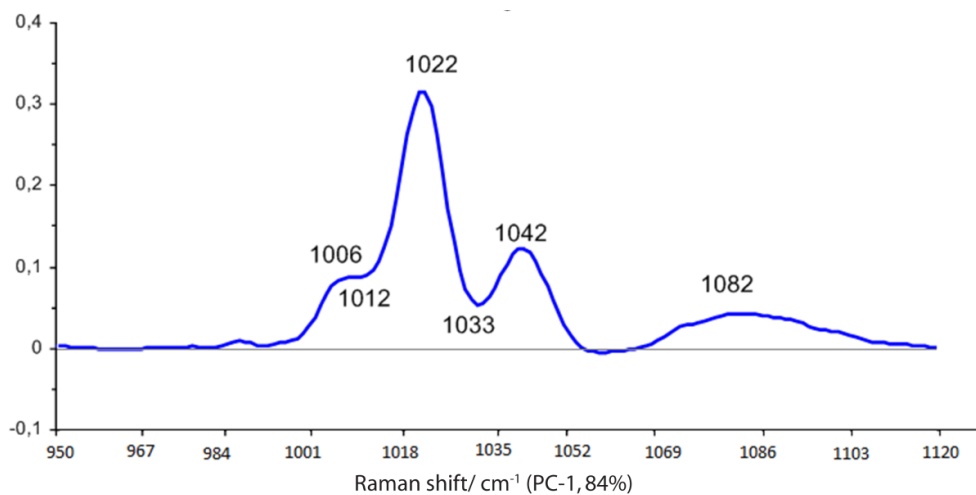

**Figure S27.** PC1 loadings for  $\text{ZnO}^{1\text{SS}}$ ,  $\text{ZnO}^{1\text{RR}}$ ,  $\text{ZnO}^{1\text{SR}}$ ,  $\text{ZnO}^{1\text{RS}}$ . Presented calculations are taken in  $960 - 1120 \text{ cm}^{-1}$  region.

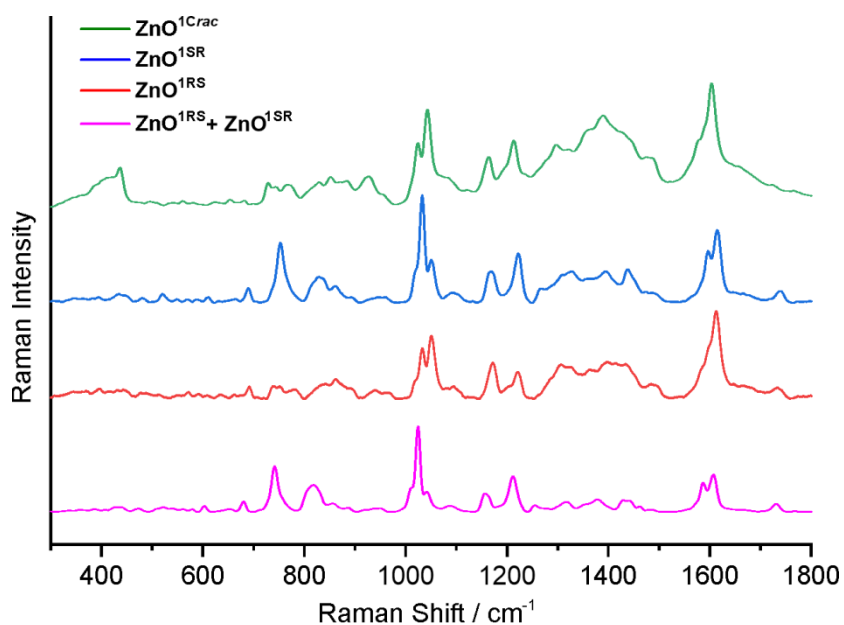

**Figure S28.** The Raman spectra of  $\text{ZnO}^{1\text{Crac}}$ ,  $\text{ZnO}^{1\text{SR}}$ ,  $\text{ZnO}^{1\text{RS}}$  and the mixture of  $\text{ZnO}^{1\text{RS}}$  and  $\text{ZnO}^{1\text{SR}}$ .

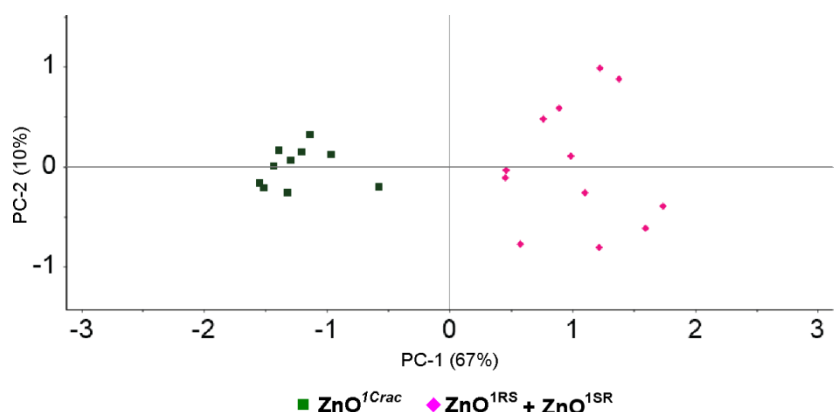

**Figure S29.** PCA scores of  $\text{ZnO}^{1rac}$  and a mixture of  $\text{ZnO}^{1RS}$  and  $\text{ZnO}^{1SR}$ . For 200 – 2000  $\text{cm}^{-1}$  region.

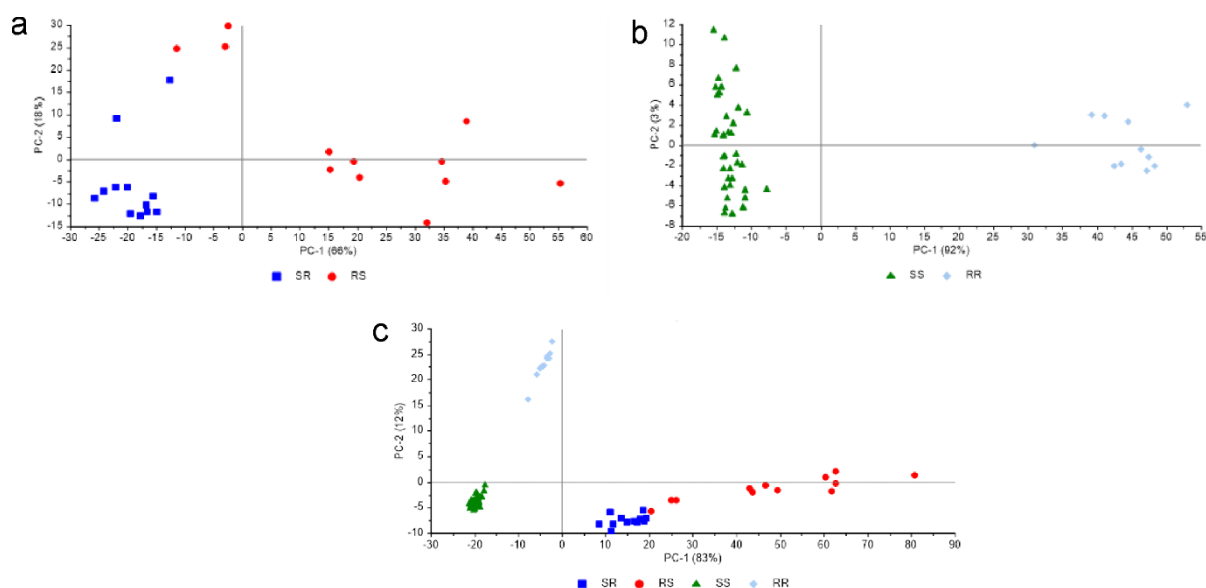

**Figure S30.** PCA scores of (1R, 2S)-, (1S, 2R)-*cis*-1-amino-2-indanol (**RS, SR**) (a), (1R, 2R)-, (1S, 2S)-*trans*-1-amino-2-indanol (**SS, RR**) (b), and (1R, 2S)-, (1S, 2R)-, (1R, 2R)-, (1S, 2S)-1-amino-2-indanol (**RS, SR, SS, RR**) (c).

## REFERENCES

- (1) Chwojnowska, E.; Wolska-Pietkiewicz, M.; Grzonka J.; Lewiński, J. Anorganometallic route to chiroptically active ZnO nanocrystals. *Nanoscale* **2017**, *9*, 14782 – 14786.
- (2) K.; Subashini, S.; Periandy. Spectroscopic (FT-IR, FT-Raman, UV, NMR, NBO) investigation and molecular docking study of (R)-2-Amino-1-PhenylEthanol. *Journal of Molecular Structure* **2016**, *1117*, 240-256.



(3) Hiroshi Iga, Tasuku Isozaki, Tadashi Suzuki, and Tejiro Ichimura. Conformations of 2-Aminoindan in a Supersonic Jet: The Role of Intramolecular N-H,,, $\pi$  Hydrogen Bonding. *J. Phys. Chem. A* **2007**, *111*, 5981-5987.

(4) Collaboration: Authors and editors of the volumes III/17B-22A-41B. Zinc oxide (ZnO) phonon wavenumbers: combination modes. In: Madelung O., Rössler U., Schulz M. (eds) II-VI and I-VII Compounds; Semimagnetic Compounds. Landolt-Börnstein - Group III Condensed Matter (Numerical Data and Functional Relationships in Science and Technology), vol 41B. Springer, Berlin, Heidelberg.
